# Supplementary material for: Normal spermatogenesis in Fank1 (fibronectin type 3 and ankyrin repeat domains 1) mutant mice
Source: PeerJ. 2019 Apr 24;7:e6827. doi: 10.7717/peerj.6827 (PMC6486812; doi:10.7717/peerj.6827)
Supplement: Supplemental Information 2 [file peerj-07-6827-s002.xlsx]

## Sheet: Sheet1
Table S1.SNPs associated with expression of the mRNAs of Fank1
Gene Symbol	Variant Id	SNP Id	P-Value	NES	Tissue
FANK1	10_127696199_T_TTG_b37	rs774011556	3e-15	-0.21	Testis
FANK1	10_127725115_A_G_b37	rs3812681	7.9e-15	-0.2	Testis
FANK1	10_127727596_G_A_b37	rs12770063	9.3e-15	-0.21	Testis
FANK1	10_127727697_A_T_b37	rs35267061	1.4e-14	-0.2	Testis
FANK1	10_127687849_A_G_b37	rs61863578	1.8e-14	-0.21	Testis
FANK1	10_127692901_G_A_b37	rs17153934	1.9e-14	-0.2	Testis
FANK1	10_127697458_C_T_b37	rs11244766	2.5e-14	-0.2	Testis
FANK1	10_127699031_T_A_b37	rs17153984	2.5e-14	-0.2	Testis
FANK1	10_127700796_C_T_b37	rs3740197	2.5e-14	-0.2	Testis
FANK1	10_127689316_C_T_b37	rs12573681	3e-14	-0.2	Testis
FANK1	10_127723916_T_C_b37	rs7075396	3.1e-14	-0.19	Testis
FANK1	10_127723955_A_G_b37	rs7071867	3.2e-14	-0.19	Testis
FANK1	10_127682960_A_G_b37	rs11244753	3.7e-14	-0.2	Testis
FANK1	10_127722268_TACTTTCTATC_T_b37	rs369889545	5.5e-14	-0.2	Testis
FANK1	10_127678979_C_T_b37	rs7914749	5.6e-14	-0.2	Testis
FANK1	10_127691951_G_C_b37	rs11593595	5.6e-14	-0.2	Testis
FANK1	10_127722422_A_G_b37	rs7920091	5.7e-14	-0.19	Testis
FANK1	10_127724516_A_G_b37	rs11599106	5.7e-14	-0.19	Testis
FANK1	10_127724530_A_AT_b37	rs397779393	5.7e-14	-0.19	Testis
FANK1	10_127724778_A_G_b37	rs1044122	5.7e-14	-0.19	Testis
FANK1	10_127661927_G_T_b37	rs3740188	7.5e-14	-0.19	Testis
FANK1	10_127662935_T_C_b37	rs7918092	7.5e-14	-0.2	Testis
FANK1	10_127683083_C_T_b37	rs11244754	8.5e-14	-0.2	Testis
FANK1	10_127728390_A_G_b37	rs3781002	1.3e-13	-0.18	Testis
FANK1	10_127719180_C_A_b37	rs11244776	2.3e-13	-0.19	Testis
FANK1	10_127723346_T_C_b37	rs10751539	3.3e-13	-0.18	Testis
FANK1	10_127680212_T_C_b37	rs35966505	4.3e-13	-0.19	Testis
FANK1	10_127717896_A_G_b37	rs7092146	4.8e-13	-0.18	Testis
FANK1	10_127719213_A_G_b37	rs11244777	5.5e-13	-0.18	Testis
FANK1	10_127714151_A_G_b37	rs10901517	5.8e-13	-0.18	Testis
FANK1	10_127714082_GAA_G_b37		6.7e-13	-0.18	Testis
FANK1	10_127714085_G_GTC_b37	rs377666328	6.7e-13	-0.18	Testis
FANK1	10_127714224_T_C_b37	rs10794056	6.7e-13	-0.18	Testis
FANK1	10_127703402_T_TA_b37	rs397690955	6.8e-13	-0.18	Testis
FANK1	10_127727808_A_G_b37	rs1278256	7e-13	-0.18	Testis
FANK1	10_127713056_T_C_b37	rs7071950	8e-13	-0.18	Testis
FANK1	10_127671958_C_T_b37	rs2366346	8.1e-13	-0.19	Testis
FANK1	10_127714422_C_T_b37	rs10901518	9.7e-13	-0.18	Testis
FANK1	10_127727768_A_G_b37	rs1278255	9.7e-13	-0.18	Testis
FANK1	10_127714459_T_C_b37	rs11244774	9.8e-13	-0.18	Testis
FANK1	10_127717851_A_G_b37	rs7092022	9.8e-13	-0.18	Testis
FANK1	10_127713466_C_T_b37	rs34984856	9.8e-13	-0.19	Testis
FANK1	10_127712790_T_G_b37	rs1913741	1.1e-12	-0.18	Testis
FANK1	10_127711917_A_G_b37	rs7920430	1.2e-12	-0.19	Testis
FANK1	10_127711954_G_A_b37	rs7903385	1.2e-12	-0.19	Testis
FANK1	10_127712086_T_C_b37	rs7924017	1.2e-12	-0.19	Testis
FANK1	10_127726682_C_T_b37	rs1278251	1.2e-12	-0.18	Testis
FANK1	10_127672076_T_C_b37	rs4282913	1.2e-12	-0.18	Testis
FANK1	10_127712755_A_C_b37	rs1913742	1.3e-12	-0.18	Testis
FANK1	10_127715984_T_TA_b37	rs370396934	2.2e-12	-0.2	Testis
FANK1	10_127714026_C_CCTT_b37	rs61434461	4e-12	-0.17	Testis
FANK1	10_127722122_T_C_b37	rs11244778	8.8e-12	-0.18	Testis
FANK1	10_127696278_G_T_b37	rs34862440	6.3e-11	-0.17	Testis
FANK1	10_127679990_G_C_b37	rs11598195	6.5e-11	-0.16	Testis
FANK1	10_127720923_C_A_b37	rs12251249	8e-11	-0.17	Testis
