# Supplementary material for: Normal spermatogenesis in Fank1 (fibronectin type 3 and ankyrin repeat domains 1) mutant mice
Source: PeerJ. 2019 Apr 24;7:e6827. doi: 10.7717/peerj.6827 (PMC6486812; doi:10.7717/peerj.6827)
Supplement: Supplemental Information 3 [file peerj-07-6827-s003.xlsx]

## Sheet: Sheet1
Table S2. List of Antibodies
Antibodies	SOURCE	IDENTIFIER
Mouse monoclonal anti-Acetylated Tubulin	Sigma, St.Louis, MO, USA	Cat#T7451
Rabbit polyclonal anti-SOX9	Millipore, Billerica, MA, USA	Cat#AB5535
Rabbit polyclonal anti-gamma H2A.X (phospho S139)	Abcam, Cambridge, MA, USA	Cat#ab2893
Goat polyclonal anti-PLZF	RnD Systems, Minneapolis, MN,USA	Cat#AF2944
Donkey anti-Mouse IgG, Alexa Fluor 488	Invitrogen, Carlsbad, CA, USA	Cat#A-21202
Donkey anti-Rabbit IgG, Alexa Fluor 488	Invitrogen, Carlsbad, CA, USA	Cat#A-21206
Cy3-AffiniPure Donkey Anti-Goat	Jackson, West Grove, PA,USA	Cat#705-165-147
