# Supplementary material for: Normal spermatogenesis in Fank1 (fibronectin type 3 and ankyrin repeat domains 1) mutant mice
Source: PeerJ. 2019 Apr 24;7:e6827. doi: 10.7717/peerj.6827 (PMC6486812; doi:10.7717/peerj.6827)
Supplement: Supplemental Information 4 [file peerj-07-6827-s004.xlsx]

## Sheet: Sheet1
Table S3. Primer sequences
Primer	Sequence
Dusp1-F	ATATCGTGCCCAACGCTGAA
Dusp1-R	AACGCTTCATATCCTCCTTGG
Klk1b21-F	GTCTCCCGAGGATCTTCAACA
Klk1b21-R	GGAGGTGCAGCATCAATCTCT
Klk1b27-F	GCCTCCTGTCCAGTCTAGAATAA
Klk1b27-R	GGCTGGTGTCATTGCCATA
Fank1-F	TGTCATGATTGACGTGCCCA
Fank1-R	GCATGAGACTGTCCTTGCCA
