# Supplementary material for: Normal spermatogenesis in Fank1 (fibronectin type 3 and ankyrin repeat domains 1) mutant mice
Source: PeerJ. 2019 Apr 24;7:e6827. doi: 10.7717/peerj.6827 (PMC6486812; doi:10.7717/peerj.6827)
Supplement: Supplemental Information 7 [file peerj-07-6827-s007.xlsx]

## Sheet: Sheet1
	Testis	Weight	testis/weight
Wt1	0.204	30.54	0.00667976
Wt2	0.1785	29.74	0.00600202
Wt3	0.1872	28.37	0.00659852
Hom1	0.195	43.75	0.00445714
Hom2	0.192	32.46	0.00591497
Hom3	0.2159	34.27	0.00629997
