# Supplementary material for: Normal spermatogenesis in Fank1 (fibronectin type 3 and ankyrin repeat domains 1) mutant mice
Source: PeerJ. 2019 Apr 24;7:e6827. doi: 10.7717/peerj.6827 (PMC6486812; doi:10.7717/peerj.6827)
Supplement: Supplemental Information 8 [file peerj-07-6827-s008.xlsx]

## Sheet: Sheet1
	Sperm concentration	Motile%	Progressive%
WT1	12.6	92	13
WT2	43.4	98	12
WT3	61.9	99	20
Hom1	30.2	95	12
Hom2	43.1	95	14
Hom3	71.7	99	15
