# Supplementary material for: Normal spermatogenesis in Fank1 (fibronectin type 3 and ankyrin repeat domains 1) mutant mice
Source: PeerJ. 2019 Apr 24;7:e6827. doi: 10.7717/peerj.6827 (PMC6486812; doi:10.7717/peerj.6827)
Supplement: Supplemental Information 9 [file peerj-07-6827-s009.xlsx]

## Sheet: Sheet1
	WT1	WT2	WT3	Hom1	Hom2	Hom3
Normal	108	121	141	130	179	182
Head	27	29	24	43	49	36
Tail	36	24	42	44	52	53
Total	171	174	207	217	279	271
%
Normal	0.631579	0.695402	0.681159	0.599078	0.641577	0.671587
Head	0.157895	0.166667	0.115942	0.198157	0.175627	0.132841
Tail	0.210526	0.137931	0.202899	0.202765	0.18638	0.195572
