# Supplementary material for: Normal spermatogenesis in Fank1 (fibronectin type 3 and ankyrin repeat domains 1) mutant mice
Source: PeerJ. 2019 Apr 24;7:e6827. doi: 10.7717/peerj.6827 (PMC6486812; doi:10.7717/peerj.6827)
Supplement: Supplemental Information 10 [file peerj-07-6827-s010.xlsx]

## Sheet: 凋亡
	Apopotic cells	Apoptotic tubules	Total tubules		Apoptotic cells/Total tubules	Apoptotic tubules/Total tubules
Hom1	101	57	269		0.375465	0.211896
Hom2	84	56	296		0.283784	0.189189
Hom3	85	44	270		0.314815	0.162963
Hom4	165	78	219		0.753425	0.356164
Wt1	59	32	274		0.215328	0.116788
Wt2	83	51	268		0.309701	0.190299
Wt3	105	56	238		0.441176	0.235294
Wt4	111	64	232		0.478448	0.275862

## Sheet: Sheet1
方差分析：单因素方差分析
SUMMARY
组	观测数	求和	平均	方差
列 1	3	0.0192803	0.00642677	1.36959e-07
列 2	3	0.0166721	0.00555736	9.44918e-07
方差分析
差异源	SS	df	MS	F	P-value	F crit
组间	1.1338e-06	1	1.1338e-06	2.09598	0.22125	7.70865
组内	2.16375e-06	4	5.40938e-07
总计	3.29755e-06	5
