# Supplementary material for: Normal spermatogenesis in Fank1 (fibronectin type 3 and ankyrin repeat domains 1) mutant mice
Source: PeerJ. 2019 Apr 24;7:e6827. doi: 10.7717/peerj.6827 (PMC6486812; doi:10.7717/peerj.6827)
Supplement: Supplemental Information 11 [file peerj-07-6827-s011.xlsx]

## Sheet: Sheet1
	WT1	WT2	WT3	Hom1	Hom2	Hom3
Klkb21	1.05944	0.98217	0.958389	0.376999	0.399422	0.202541
Klkb27	1.17943	0.862647	0.95792	0.192842	0.207528	0.115349
Dusp1	1.06328	0.938579	0.998142	1.03019	0.994444	0.429415
Fank1	1.11722	0.9796	0.903175	0.489179	0.584167	0.390993
